# Supplementary material for: Chitosan-Induced Physiological and Biochemical Regulations Confer Drought Tolerance in Pot Marigold (Calendula officinalis L.)
Source: MDPI journal article supplement (doi:10.3390/agronomy12020474), 2022-02-14
Supplement: s1 [file s1]

**Table S1.** The maximum and minimum air temperature, during the growth period of experimentation.

| Month      | Week            | Temperature (°C) |         |      |
|------------|-----------------|------------------|---------|------|
|            |                 | Minimum          | Maximum | Mean |
| Dec-2019   | 1 <sup>st</sup> | 18               | 28      | 23   |
|            | 2 <sup>nd</sup> | 15               | 23      | 19   |
|            | 3 <sup>rd</sup> | 13               | 23      | 18   |
|            | 4 <sup>th</sup> | 12               | 23      | 17.5 |
| Jan-2020   | 1 <sup>st</sup> | 10               | 13      | 11.5 |
|            | 2 <sup>nd</sup> | 12               | 18      | 15   |
|            | 3 <sup>rd</sup> | 12               | 19      | 15.5 |
|            | 4 <sup>th</sup> | 14               | 21      | 17.5 |
| Feb-2020   | 1 <sup>st</sup> | 13               | 22      | 17.5 |
|            | 2 <sup>nd</sup> | 14               | 26      | 20   |
|            | 3 <sup>rd</sup> | 16               | 28      | 22   |
|            | 4 <sup>th</sup> | 18               | 30      | 24   |
| March-2020 | 1 <sup>st</sup> | 17               | 28      | 22.5 |
|            | 2 <sup>nd</sup> | 15               | 25      | 20   |
|            | 3 <sup>rd</sup> | 19               | 31      | 25   |
|            | 4 <sup>th</sup> | 19               | 28      | 23.5 |

**Table S2.** Number of leaves (NOL), leaf area (LA), shoot length (SL), root length (RL), shoot fresh weight (SFW), root fresh weight (RFW), shoot dry weight (SDW), and root dry weight (RDW) of *Calendula officinalis* applied with foliar application of chitosan (0, 2.5, 5, 7.5, 10 mg L<sup>-1</sup>).

| <b>Chitosan<br/>mg L<sup>-1</sup></b> | <b>NOL</b>      | <b>LA (cm<sup>2</sup>)</b> | <b>SL (cm)</b> | <b>RL (cm)</b> | <b>SFW (g)</b> | <b>RFW (g)</b> | <b>SDW (g)</b> | <b>RDW(g)</b> |
|---------------------------------------|-----------------|----------------------------|----------------|----------------|----------------|----------------|----------------|---------------|
| 0                                     | 10.67 c ± 0.34  | 0.22 b ± 0.04              | 16.00 a ± 0.59 | 16.00 c ± 0.59 | 5.05 d ± 0.09  | 1.62 b ± 0.03  | 1.64 d ± 0.05  | 0.52 b ± 0.02 |
| 2.5                                   | 11.00 bc ± 0.59 | 0.18 c ± 0.03              | 17.67 a ± 1.48 | 22.67 b ± 1.80 | 10.78 b ± 0.46 | 2.09 a ± 0.09  | 2.53 c ± 0.06  | 0.54 b ± 0.03 |
| 5                                     | 12.33 ab ± 0.34 | 0.23 b ± 0.06              | 18.33 a ± 1.80 | 28.33 a ± 1.22 | 7.91 c ± 0.19  | 1.28 c ± 0.03  | 3.16 b ± 0.24  | 0.41 c ± 0.04 |
| 7.5                                   | 12.67 a ± 0.34  | 0.27 a ± 0.03              | 19.00 a ± 0.59 | 29.33 a ± 0.34 | 12.79 a ± 0.20 | 1.79 b ± 0.09  | 4.25 a ± 0.03  | 0.67 a ± 0.04 |
| 10                                    | 10.00 c ± 0.59  | 0.18 c ± 0.06              | 10.00 b ± 0.59 | 15.00 c ± 0.59 | 4.54 d ± 0.18  | 0.65 d ± 0.04  | 1.44 d ± 0.08  | 0.19 d ± 0.03 |
| <i>P</i> -value                       | 0.0081          | 0.0002                     | 0.0013         | <0.0001        | <0.0001        | <0.0001        | <0.0001        | <0.0001       |
| CV                                    | 6.83            | 7.90                       | 11.93          | 8.03           | 5.28           | 7.05           | 7.73           | 8.58          |

Values are mean ± SE and letters represent significant differences at  $p < 0.05$  according to LSD test (Each mean contains 3 replications). CV, Coefficient of variation.

**Table S3.** The chlorophyll (*a*, *b*) and carotenoid (Car) of *Calendula officinalis* applied with foliar application of chitosan (0, 2.5, 5, 7.5, 10 mg L<sup>-1</sup>) under drought stress (60% FC).

| Chitosan<br>mg L <sup>-1</sup> | Chl <i>a</i> (mg g <sup>-1</sup> ) | Chl <i>b</i> (mg g <sup>-1</sup> ) | Car (mg g <sup>-1</sup> ) |
|--------------------------------|------------------------------------|------------------------------------|---------------------------|
| 0                              | 0.36 d ± 0.05                      | 0.86 d ± 0.07                      | 0.50 d ± 0.06             |
| 2.5                            | 0.44 c ± 0.04                      | 1.17 c ± 0.04                      | 0.59 c ± 0.07             |
| 5                              | 0.57 b ± 0.02                      | 1.44 b ± 0.08                      | 0.63 b ± 0.09             |
| 7.5                            | 0.67 a ± 0.02                      | 1.64 a ± 0.04                      | 0.72 a ± 0.04             |
| 10                             | 0.43 c ± 0.04                      | 1.20 c ± 0.08                      | 0.59 c ± 0.08             |
| <i>P</i> -value                | <0.0001                            | <0.0001                            | <0.0001                   |
| CV                             | 5.51                               | 1.67                               | 3.05                      |

Values are mean ± SE and letters represent significant differences at *p* < 0.05 according to LSD test (Each mean contains 3 replications). CV, Coefficient of variation.
